# Supplementary material
Source: MDPI journal article supplement (https://www.mdpi.com/2227-9040/10/5/175)
Supplement: s1 [file s1]

Table S2: Analytical data for SPCE/Cu-BPND sensor response for DEA NONOate detection

| Current peak         |             |             |             |       |       |
|----------------------|-------------|-------------|-------------|-------|-------|
| DEA NONOate/ $\mu$ M | electrode 1 | electrode 2 | electrode 3 | mean  | STD   |
| 0.1                  | 47.89       | 42.09       | 47.88       | 45.95 | 3.35  |
| 0.2                  | 48.11       | 42.1        | 48.41       | 46.21 | 3.56  |
| 0.3                  | 49.19       | 43.41       | 48.96       | 47.19 | 3.27  |
| 0.4                  | 53.62       | 44.13       | 47.86       | 48.54 | 4.78  |
| 0.5                  | 55.37       | 46.9        | 49.44       | 50.6  | 4.35  |
| 0.6                  | 55.27       | 49.31       | 49.89       | 51.49 | 3.286 |
| 0.7                  | 56.92       | 49.31       | 49.59       | 51.94 | 4.32  |
| 0.8                  | 60.36       | 51.24       | 52.47       | 54.69 | 4.95  |
| 0.9                  | 61.84       | 52.56       | 54.13       | 56.18 | 4.967 |
| 1                    | 64.62       | 56.41       | 55.87       | 58.97 | 4.90  |
