# Supplementary material
Source: MDPI journal article supplement (https://www.mdpi.com/2227-9040/10/5/175)
Supplement: s1 [file s1]

Table S1.1: The synthesise protocol by time variation ranging from 8 minutes to 15 minutes at a constant power supply of 400 W to the system

| <b>Time/min</b> | <b>Power/W</b> | <b>Absorbance</b> | <b>Wavelength/nm</b> |
|-----------------|----------------|-------------------|----------------------|
| <b>8</b>        | 400            | 0.51              | 349.5                |
| <b>10</b>       | 400            | 1.04              | 349.5                |
| <b>13</b>       | 400            | 1.51              | 348.5                |
| <b>15</b>       | 400            | 2.47              | 349.5                |

Table S1.2: The synthesis protocol by power variation from 400 W to 700 W with synthesise duration kept at 8 minutes and kept at 13 minutes for a change

| <b>Power/W</b> | <b>Time/min</b> | <b>Absorbance</b> | <b>Wavelength/nm</b> |
|----------------|-----------------|-------------------|----------------------|
| <b>400</b>     | 8               | 0.51              | 348.9                |
| <b>500</b>     | 8               | 0.97              | 349.5                |
| <b>600</b>     | 8               | 0.60              | 347.5                |
| <b>700</b>     | 8               | 0.58              | 348.5                |
|                |                 |                   |                      |
| <b>400</b>     | 13              | 1.51              | 348.5                |
| <b>500</b>     | 13              | 0.93              | 349.5                |
| <b>600</b>     | 13              | 1.29              | 349.5                |
