# Supplementary material
Source: MDPI journal article supplement (https://www.mdpi.com/2227-9040/10/5/175)
Supplement: s1 [file s1]

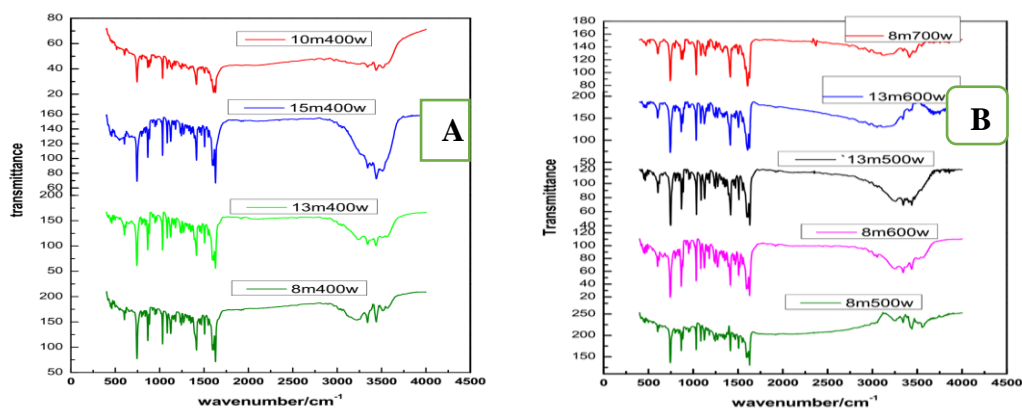

Figure S1: FT-IR spectra of the BPND ligand synthesised at 400 W for 8, 10 13, and 15 min (A) and power variation from 500 W to 700 W with an increase of 100 W only at 8 min and 13 min (B) in the spectral range 400-4000  $\text{cm}^{-1}$ .
