# Supplementary material
Source: MDPI journal article supplement (https://www.mdpi.com/2227-9040/10/5/175)
Supplement: s1 [file s1]

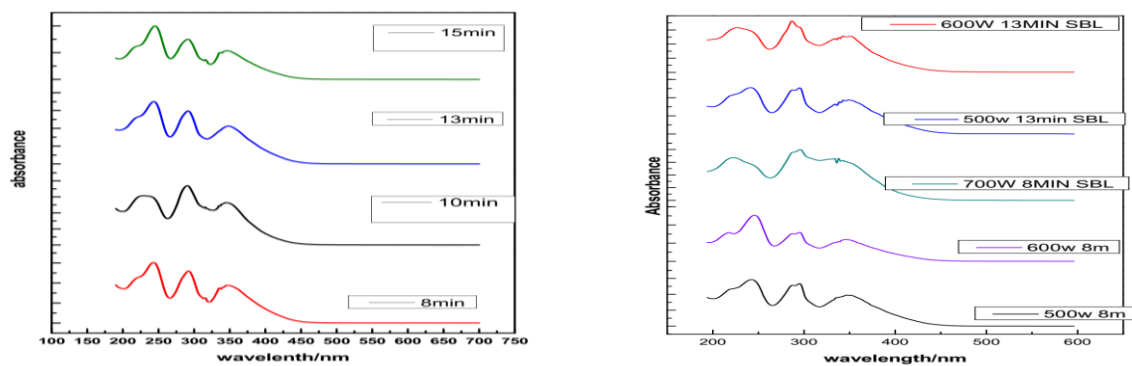

Figure S2: Electronic spectra of a BPND ligand after microwave synthesis based on the time variation of 8, 10, 13 and 15 min for the constant microwave power of 400 W (A), power variation of 400,500, 600 and 700 W for both 8 and 13 min (B)
