# Supplementary material
Source: MDPI journal article supplement (https://www.mdpi.com/2227-9040/10/5/175)
Supplement: s1 [file s1]

Archive with 7 entries (7 files):
- Figure S1 FT-IR spectra of the BPND ligand synthesised.pdf
- Figure S2 Electronic spectra of a BPND ligand after microwave synthesis.pdf
- Scheme S1.pdf
- Scheme S2 Concept map for NO detection process.pdf
- Table S1 BPND optimisation studies parameters.pdf
- Table S2 Analytical data for  SPCECu-BPND sensor response for DEA NONOate detection.pdf
- Table S3 Analytical data for  SPCENi-BPND sensor response for DEA NONOate detection.pdf
