# Supplementary material
Source: MDPI journal article supplement (https://www.mdpi.com/2227-9040/10/5/175)
Supplement: s1 [file s1]

## Material synthesis flow diagram

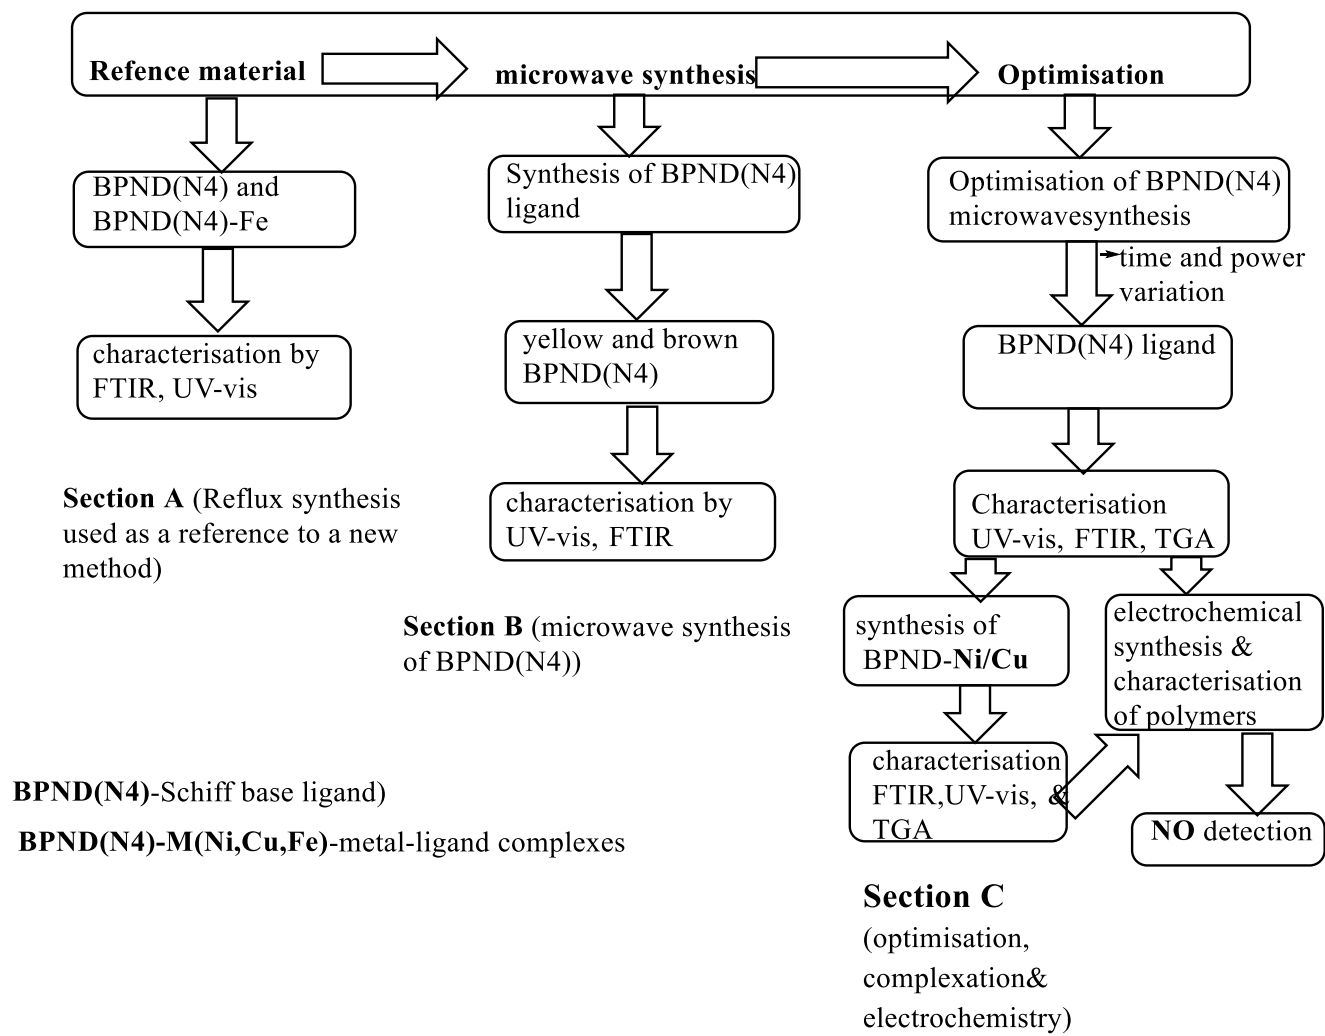

Scheme S1: Synthesis protocol and characterization techniques performed.
