# Supplementary material
Source: MDPI journal article supplement (https://www.mdpi.com/2227-9040/10/5/175)
Supplement: s1 [file s1]

Table S3: Analytical data for SPCE/Ni-BPND sensor response for DEA NONOate detection

| Current peak         |             |             |             |       |      |
|----------------------|-------------|-------------|-------------|-------|------|
| DEA NONOate/ $\mu$ M | electrode 1 | electrode 2 | electrode 3 | mean  | STD  |
| 0.1                  | 42.89       | 48.24       | 45.44       | 45.52 | 2.68 |
| 0.2                  | 46.09       | 48.24       | 50.85       | 48.39 | 2.39 |
| 0.3                  | 49.09       | 53.01       | 60.99       | 54.36 | 6.06 |
| 0.4                  | 45.64       | 54.34       | 52.77       | 50.92 | 4.64 |
| 0.5                  | 52.31       | 54.01       | 53.15       | 53.16 | 0.85 |
| 0.6                  | 55.98       | 58.37       | 53.67       | 56.01 | 2.35 |
| 0.7                  | 50.65       | 61.54       | 57.4        | 56.53 | 5.50 |
| 0.8                  | 54.08       | 63.98       | 57.42       | 58.49 | 5.04 |
| 0.9                  | 52.65       | 63.5        | 59.58       | 58.58 | 5.49 |
| 1                    | 58.98       | 64.34       | 58.93       | 60.75 | 3.11 |
