# Supplementary material
Source: MDPI journal article supplement (https://www.mdpi.com/2227-9040/10/5/175)

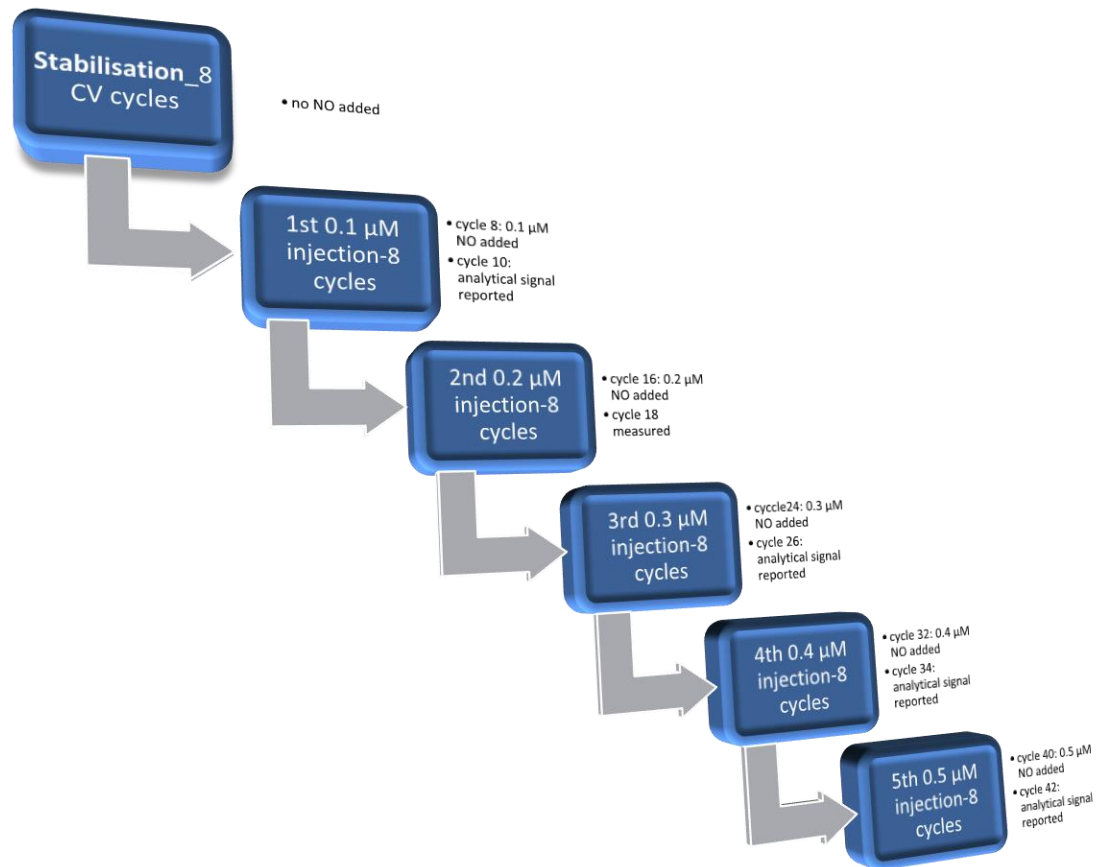

Scheme S2: Concept map for NO detection process

Supplement: s1 [file s1 › Scheme S2 Concept map for NO detection process.pdf]
